# Supplementary material
Source: Springer Nature journal article supplement (https://www.springermedizin.de/resource/supplementary/10194_2013_1038_MOESM2_ESM.pdf/9423284)
Supplement: MOESM2 [file 9423284]

## Additional file 2. Diagnostic algorithm

# *Lifting The Burden*

in official relations with  
the World Health Organization

## The Global Campaign against Headache

### **Diagnostic algorithm for headache according to the diagnostic questions in the HARDSHIP questionnaire**

Responses to the diagnostic questions of the HARDSHIP questionnaire, for each bothersome headache separately identified by the participant, should be entered into this algorithm.

The algorithm must be applied from the beginning in each case.

#### **Begin here:**

| <b>Flags for manual review</b> | <b>HARDSHIP question</b> | <b>Response</b>                          | <b>Value</b> | <b>Action</b>                                                              |
|--------------------------------|--------------------------|------------------------------------------|--------------|----------------------------------------------------------------------------|
|                                | 14                       | Headache on $\geq 15$ days/month         | 0            | Continue with migraine algorithm                                           |
|                                |                          |                                          | 1            | Continue below                                                             |
|                                | 18                       | Acute medication on $\geq 10$ days/month | 0            | Not medication-overuse headache (MOH); manually review for final diagnosis |
|                                |                          |                                          | 1            | Possible MOH; manually review for final diagnosis                          |

| <b>Migraine algorithm</b> | <b>HARDSHIP question</b>             | <b>Response</b>         | <b>Value</b> | <b>Calculate 1<sup>st</sup> intermediate score</b> | <b>Calculate 2<sup>nd</sup> intermediate score</b> | <b>Final score and diagnosis</b>         |
|---------------------------|--------------------------------------|-------------------------|--------------|----------------------------------------------------|----------------------------------------------------|------------------------------------------|
| B                         | 21/23                                | < 4 h                   | 0            |                                                    |                                                    | 0                                        |
|                           |                                      | > 3 d (72 h)            | 0            |                                                    |                                                    | 0                                        |
|                           |                                      | ≥ 4 h and ≤ 3 d (72 h)  | 1            |                                                    |                                                    | 1                                        |
| C                         | 24                                   | Not bad                 | 0            | 24+25+26+27 ≥ 2<br>24+25+26+27 < 2                 |                                                    | 1<br>0                                   |
|                           |                                      | Quite bad               | 1            |                                                    |                                                    |                                          |
|                           |                                      | Very bad                | 1            |                                                    |                                                    |                                          |
|                           | 25                                   | Pulsating/throbbing yes | 1            |                                                    |                                                    |                                          |
|                           |                                      | Pressing/tightening yes | 0            |                                                    |                                                    |                                          |
|                           | 26                                   | One side                | 1            |                                                    |                                                    |                                          |
|                           |                                      | Both sides              | 0            |                                                    |                                                    |                                          |
| 27                        | Worsened by physical activity yes/no | 1/0                     |              |                                                    |                                                    |                                          |
| D                         | 29                                   | Nausea yes/no           | 1/0          | N+V ≥ 1: 1<br>N+V = 0: 0                           | n/v+pt/pn ≥ 1<br>n/v+pt/pn = 0                     | 1<br>0                                   |
|                           | 30                                   | Vomiting yes/no         | 1/0          |                                                    |                                                    |                                          |
|                           | 31                                   | Photophobia (pt) yes/no | 1/0          | Pt+pn = 2: 1<br>Pt+pn ≤ 1: 0                       |                                                    |                                          |
|                           | 32                                   | Phonophobia (pn) yes/no | 1/0          |                                                    |                                                    |                                          |
|                           |                                      |                         |              |                                                    | B+C+D = 3                                          | <b>Migraine</b>                          |
|                           |                                      |                         |              |                                                    | B+C+D < 3                                          | Not migraine, go to <b>TTH algorithm</b> |

| <b>TTH algorithm</b> | <b>HARDSHIP question</b>             | <b>Response</b>         | <b>Value</b> | <b>Calculate 1<sup>st</sup> intermediate score</b> | <b>Calculate 2<sup>nd</sup> intermediate score</b> | <b>Final score and diagnosis</b>                  |
|----------------------|--------------------------------------|-------------------------|--------------|----------------------------------------------------|----------------------------------------------------|---------------------------------------------------|
| B                    | 21/23                                | < ½ h                   | 0            |                                                    |                                                    | 0                                                 |
|                      |                                      | > 7 d                   | 0            |                                                    |                                                    | 0                                                 |
|                      |                                      | ≥ ½ h and ≤ 7 d (168 h) | 1            |                                                    |                                                    | 1                                                 |
| C                    | 24                                   | Not bad                 | 1            | 24+25+26+27 ≥ 2<br>24+25+26+27 < 2                 |                                                    | 1<br>0                                            |
|                      |                                      | Quite bad               | 1            |                                                    |                                                    |                                                   |
|                      |                                      | Very bad                | 0            |                                                    |                                                    |                                                   |
|                      | 25                                   | Pulsating/throbbing yes | 0            |                                                    |                                                    |                                                   |
|                      |                                      | Pressing/tightening yes | 1            |                                                    |                                                    |                                                   |
|                      | 26                                   | One side                | 0            |                                                    |                                                    |                                                   |
|                      |                                      | Both sides              | 1            |                                                    |                                                    |                                                   |
| 27                   | Worsened by physical activity yes/no | 0/1                     |              |                                                    |                                                    |                                                   |
| D                    | 29                                   | Nausea yes/no           | 1/0          | N+V ≥ 1: 0                                         | n/v+pt/pn = 2<br>n/v+pt/pn < 2                     | 1<br>0                                            |
|                      | 30                                   | Vomiting yes/no         | 1/0          | N+V = 0: 1                                         |                                                    |                                                   |
|                      | 31                                   | Photophobia (pt) yes/no | 1/0          | Pt+pn ≤ 1: 1                                       |                                                    |                                                   |
|                      | 32                                   | Phonophobia (pn) yes/no | 1/0          | Pt+pn = 2: 0                                       |                                                    |                                                   |
|                      |                                      |                         |              |                                                    | B+C+D = 3                                          | <b>TTH</b>                                        |
|                      |                                      |                         |              |                                                    | B+C+D < 3                                          | Not TTH, go to <b>probable migraine algorithm</b> |

| Probable migraine algorithm | HARDSHIP question                    | Response                | Value | Calculate 1 <sup>st</sup> intermediate score | Calculate 2 <sup>nd</sup> intermediate score | Final score and diagnosis                     |
|-----------------------------|--------------------------------------|-------------------------|-------|----------------------------------------------|----------------------------------------------|-----------------------------------------------|
| B                           | 21/23                                | < 4 h                   | 0     |                                              |                                              | 0                                             |
|                             |                                      | > 3 d (72 h)            | 0     |                                              |                                              | 0                                             |
|                             |                                      | ≥ 4 h and ≤ 3 d (72 h)  | 1     |                                              |                                              | 1                                             |
| C                           | 24                                   | Not bad                 | 0     | $24+25+26+27 \geq 2$<br>$24+25+26+27 < 2$    |                                              | 1<br>0                                        |
|                             |                                      | Quite bad               | 1     |                                              |                                              |                                               |
|                             |                                      | Very bad                | 1     |                                              |                                              |                                               |
|                             | 25                                   | Pulsating/throbbing yes | 1     |                                              |                                              |                                               |
|                             |                                      | Pressing/tightening yes | 0     |                                              |                                              |                                               |
|                             | 26                                   | One side                | 1     |                                              |                                              |                                               |
|                             |                                      | Both sides              | 0     |                                              |                                              |                                               |
| 27                          | Worsened by physical activity yes/no | 1/0                     |       |                                              |                                              |                                               |
| D                           | 29                                   | Nausea yes/no           | 1/0   | $N+V \geq 1: 1$<br>$N+V < 1: 0$              | $n/v+pt/pn \geq 1$<br>$n/v+pt/pn < 1$        | 1<br>0                                        |
|                             | 30                                   | Vomiting yes/no         | 1/0   |                                              |                                              |                                               |
|                             | 31                                   | Photophobia (pt) yes/no | 1/0   | $Pt+pn = 2: 1$<br>$Pt+pn \leq 1: 0$          |                                              |                                               |
|                             | 32                                   | Phonophobia (pn) yes/no | 1/0   |                                              |                                              |                                               |
|                             |                                      |                         |       |                                              | B+C+D = 2                                    | <b>Probable migraine</b>                      |
|                             |                                      |                         |       |                                              | B+C+D < 2                                    | Not pMig, go to <b>probable TTH algorithm</b> |

| Probable TTH algorithm | HARDSHIP question                    | Response                | Value | Calculate 1 <sup>st</sup> intermediate score | Calculate 2 <sup>nd</sup> intermediate score | Final score and diagnosis                 |
|------------------------|--------------------------------------|-------------------------|-------|----------------------------------------------|----------------------------------------------|-------------------------------------------|
| B                      | 21/23                                | < ½ h                   | 0     |                                              |                                              | 0                                         |
|                        |                                      | > 7 d                   | 0     |                                              |                                              | 0                                         |
|                        |                                      | ≥ ½ h and ≤ 7 d (168 h) | 1     |                                              |                                              | 1                                         |
| C                      | 24                                   | Not bad                 | 1     | $24+25+26+27 \geq 2$<br>$24+25+26+27 < 2$    |                                              | 1<br>0                                    |
|                        |                                      | Quite bad               | 1     |                                              |                                              |                                           |
|                        |                                      | Very bad                | 0     |                                              |                                              |                                           |
|                        | 25                                   | Pulsating/throbbing yes | 0     |                                              |                                              |                                           |
|                        |                                      | Pressing/tightening yes | 1     |                                              |                                              |                                           |
|                        | 26                                   | One side                | 0     |                                              |                                              |                                           |
|                        |                                      | Both sides              | 1     |                                              |                                              |                                           |
| 27                     | Worsened by physical activity yes/no | 0/1                     |       |                                              |                                              |                                           |
| D                      | 29                                   | Nausea yes/no           | 1/0   | N+V ≥ 1: 0                                   | $n/v+pt/pn = 2$<br>$n/v+pt/pn < 2$           | 1<br>0                                    |
|                        | 30                                   | Vomiting yes/no         | 1/0   | N+V = 0: 1                                   |                                              |                                           |
|                        | 31                                   | Photophobia (pt) yes/no | 1/0   | Pt+pn ≤ 1: 1                                 |                                              |                                           |
|                        | 32                                   | Phonophobia (pn) yes/no | 1/0   | Pt+pn = 2: 0                                 |                                              |                                           |
|                        |                                      |                         |       |                                              | B+C+D = 2                                    | <b>Probable TTH</b>                       |
|                        |                                      |                         |       |                                              | B+C+D < 2                                    | Not pTTH,<br><b>undetermined headache</b> |

Repeat the algorithm for the next most bothersome headache when another headache has been identified by the participant.
